# Supplementary material for: Enhancing the Positive Predictive Value of EGD for Diagnosis of Barrett’s Esophagus Through EsoGuard® Triage
Source: bioRxiv or medRxiv preprint supplement (doi:10.1101/2024.07.26.24311013), 2024-07-27
Supplement: Supplementary file [file media-1.pdf]

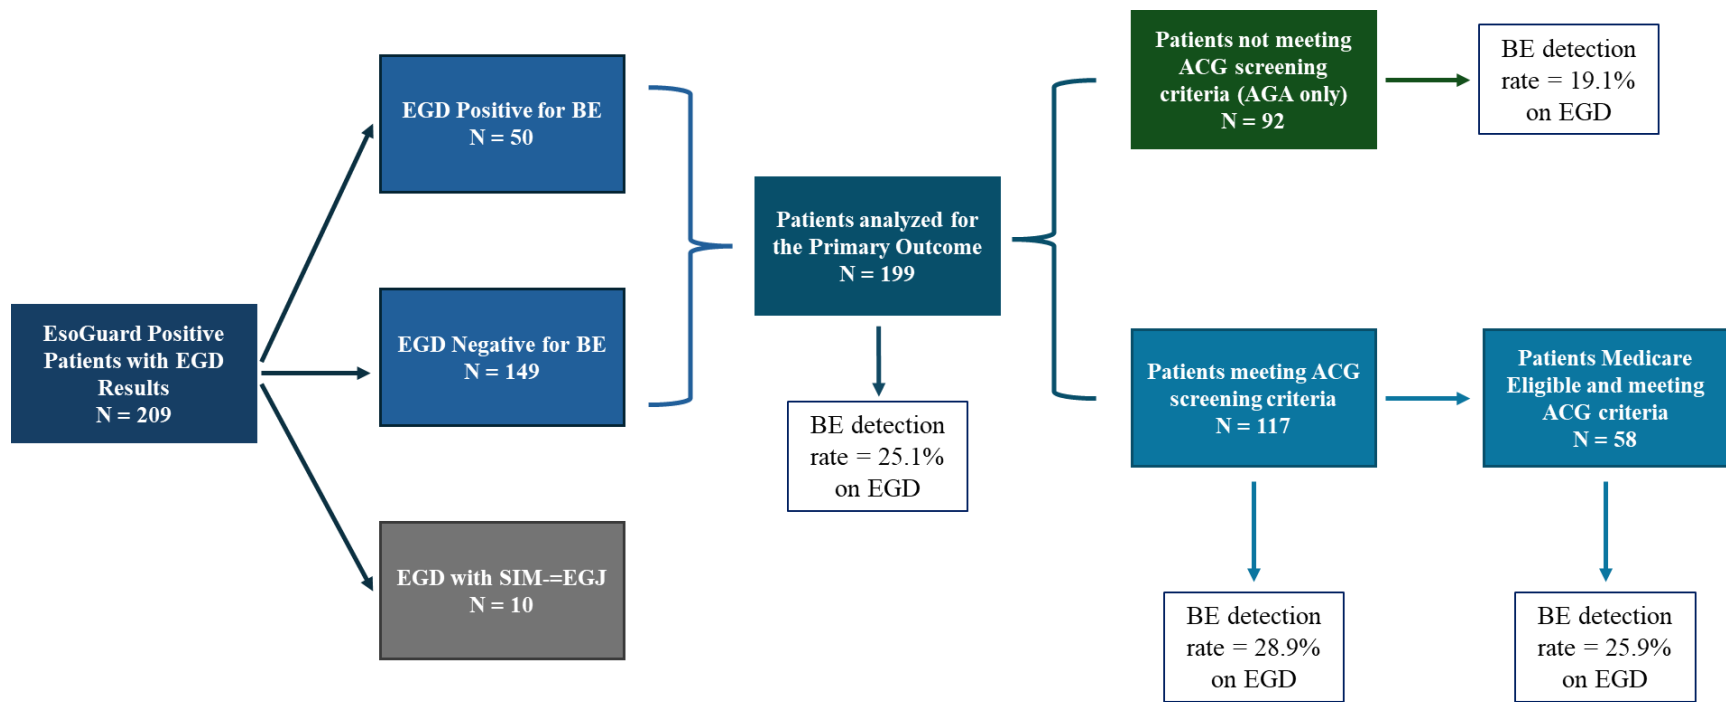

**Supplemental Figure 1.** Patient flow chart and associated primary outcomes

EGD = esophagogastroduodenoscopy; BE = Barrett's esophagus; SIM-EGJ = Specialized Intestinal Metaplasia of the Esophagogastric Junction; AGA = American Gastroenterological Association; ACG = American College of Gastroenterology
